# Supplementary material
Source: Springer Nature journal article supplement (https://www.springermedizin.de/resource/supplementary/12875_2013_910_MOESM2_ESM.pdf/9435390)

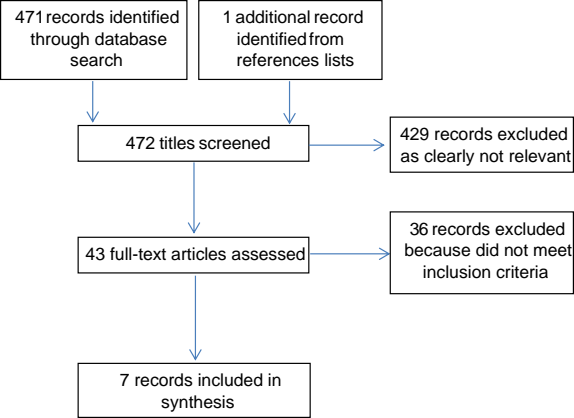

Supplement: MOESM2 [file 9435390]
